# Supplementary material for: Green Production of Cladribine by Using Immobilized 2′-Deoxyribosyltransferase from Lactobacillus delbrueckii Stabilized through a Double Covalent/Entrapment Technology
Source: MDPI journal article supplement (doi:10.3390/biom11050657), 2021-04-29
Supplement: s1 [file s1]

**Table S1.** Computed pKa values of the surface exposed lysine residues in *Ld*NDT using the H++ server (<http://biophysics.cs.vt.edu/H++>).

| <b>N-Terminus</b> | <b>pKa, int*</b> | <b>pKa**</b> |
|-------------------|------------------|--------------|
| <i>Ld</i> NDT     | 7.101            | 6.602        |
| <b>Lys (#)</b>    | <b>pKa, int*</b> | <b>pKa**</b> |
| 3                 | 10.920           | 11.682       |
| 19                | 9.871            | > 12.000     |
| 22                | 10.102           | 11.706       |
| 29                | 10.298           | 11.760       |
| 48                | 10.024           | 11.201       |
| 62                | 9.797            | 11.002       |
| 77                | > 12.000         | > 12.000     |
| 135               | 9.785            | 11.134       |
| 140               | 10.300           | > 12.000     |
| 146               | 11.390           | > 12.000     |

\*pKa, int: computed pKa of a group assuming that there is not interaction with any other titratable group in the protein. \*\*It corresponds to the mid-point of a titration curve (pKa  $\frac{1}{2}$ )
